# Supplementary material for: Tailoring the nanoscale morphology of HKUST-1 thin films via codeposition and seeded growth
Source: publisher site journal article supplement (doi:10.3762/bjnano.8.230), 2017-11-03
Supplement: Additional file 1 [file 2190-4286-8-230-S1.pdf]

# **Supporting Information**

for

## **Tailoring the nanoscale morphology of HKUST-1 thin films via codeposition and seeded growth**

Landon J. Brower, Lauren K. Gentry, Amanda L. Napier and Mary E. Anderson\*

Address: Hope College, Department of Chemistry, Holland, MI 49422, United States

Email: Mary E. Anderson\* - [meanderson@hope.edu](mailto:meanderson@hope.edu)

\* Corresponding author

### **Additional experimental data**

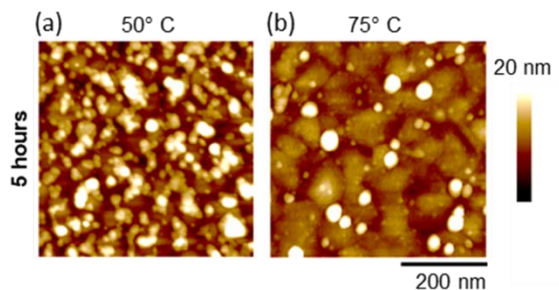

**Figure S1:** AFM images ( $500 \text{ nm} \times 500 \text{ nm}$ ) of HKUST-1 surMOFs fabricated for 5 h via codeposition at (a)  $50 \text{ }^\circ\text{C}$  and (b)  $75 \text{ }^\circ\text{C}$  on SAM-coated Au surfaces. These images at a higher magnification than those shown in Figure 2 allow for the clear visualization of the nanoscale MOF crystallites. Both images were set to the same  $z$ -scale (20 nm).

**Infrared spectroscopy:** IR spectra collected from  $3800\text{--}600 \text{ cm}^{-1}$  in the attenuated total reflectance (ATR) mode of a Thermo Scientific Nicolet iS50 instrument. The spectral resolution was  $4 \text{ cm}^{-1}$  and a bare gold substrate was used as the background for the surMOF films.

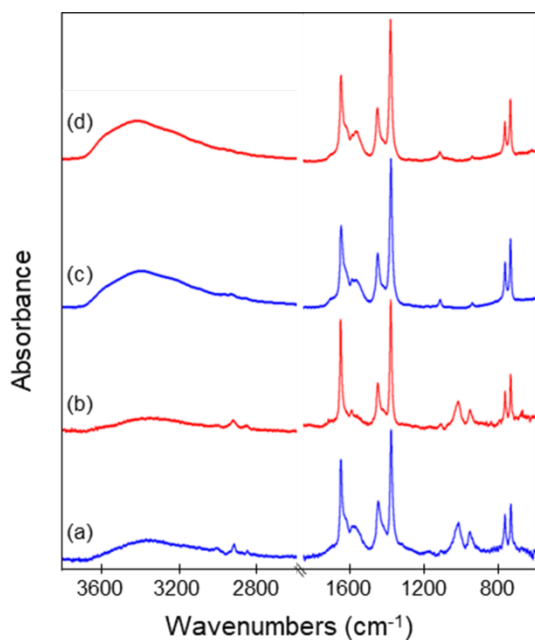

**Figure S2:** IR spectra of HKUST-1 surMOFs fabricated via codeposition (a) at  $25 \text{ }^\circ\text{C}$  for 1.5 h and (b) at  $50 \text{ }^\circ\text{C}$  for 5 h on SAM-coated Au surfaces. Four additional layers of HKUST-1 were added to these codeposited samples via layer-by-layer deposition. The subsequent IR spectra are shown in (c,d).
